# Supplementary material for: Enhanced UV transparency in phosphate glasses via multi-wall carbon nanotubes
Source: Royal Society of Chemistry journal article supplement (doi:10.1039/c6tc03398a), 2016-01-01
Supplement: c6tc03398a1.pdf [file c6tc03398a1.pdf]

## Supporting information

# Enhanced UV transparency in phosphate glasses *via* multi-wall carbon nanotubes

José A. Jiménez <sup>\*,a</sup>, Mariana Sendova <sup>#,b</sup>, Esteban Rosim Fachini <sup>c</sup>, Chunqing Zhao <sup>a</sup>

<sup>a</sup> *Department of Chemistry, University of North Florida, Jacksonville, FL 32224, USA*

<sup>b</sup> *Optical Spectroscopy & Nano-Materials Lab, New College of Florida, Sarasota, FL 34243, USA*

<sup>c</sup> *Department of Physical Sciences, General Studies Faculty, University of Puerto Rico, Río Piedras, PR 00931, USA*

\* Corresponding author. E-mail: [jimenez.materials@gmail.com](mailto:jimenez.materials@gmail.com)

Present address: Functional Films Lab, BASF Corporation, 2655 Route 22 West, Union, NJ  
07083, USA

# Corresponding author. E-mail: [sendova@ncf.edu](mailto:sendova@ncf.edu)

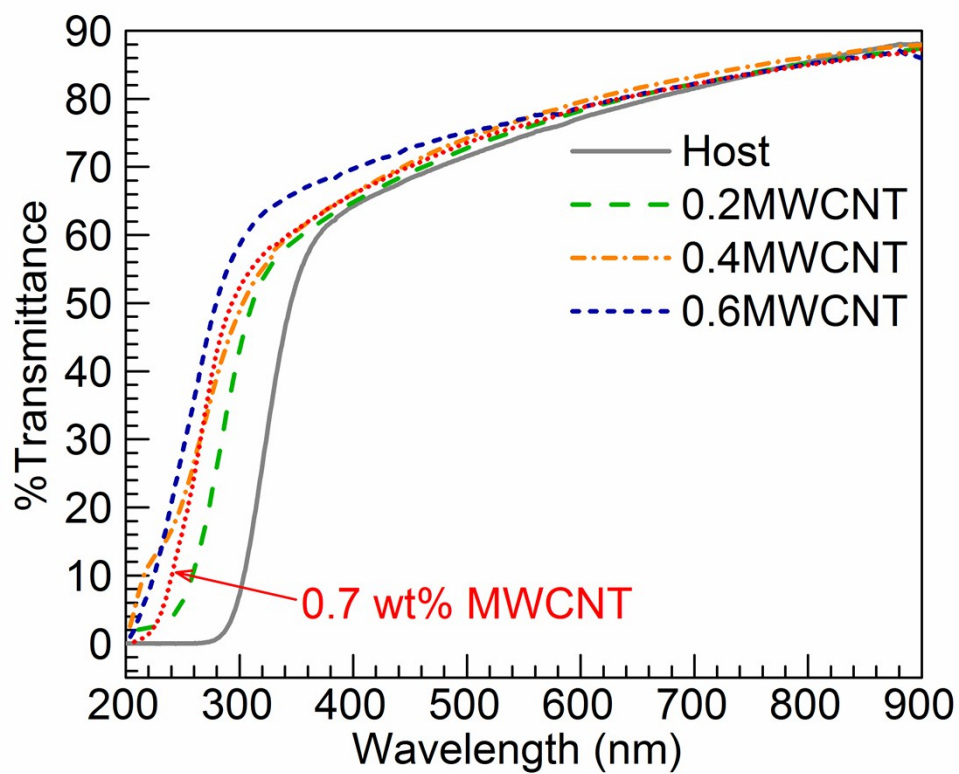

**Fig. S1.** The optical transmission spectra for the host and 0.2-0.6MWCNT glasses presented together with the spectrum for a glass made with 0.7 wt% MWCNT which shows loss in UV transparency relative to the 0.6MWCNT glass.
